# Supplementary material for: Role of HIF1A, VEGFA and VEGFR2 SNPs in the Susceptibility and Progression of COPD in a Spanish Population
Source: PubMed Central journal article supplement (PMC4862690; doi:10.1371/journal.pone.0154998), 2016-05-10
Supplement: pone.0154998.s002.pdf [file pone.0154998.s002.pdf]

**S2 Table.** Association study of *VEGFR2* haplotypes and COPD.

| Haplotype <sup>a</sup> | COPD patients vs. Nonsmoking controls |                          |         | COPD patients vs. Smoking controls |                          |         |
|------------------------|---------------------------------------|--------------------------|---------|------------------------------------|--------------------------|---------|
|                        | Frequency (%)                         | OR <sub>aj</sub> (95%CI) | p-value | Frequency (%)                      | OR <sub>aj</sub> (95%CI) | p-value |
| TC                     | 71.29                                 | 1                        | —       | 69.26                              | 1                        | —       |
| AC                     | 17.03                                 | 0.96 (0.60 - 1.56)       | >0.05   | 18.18                              | 1.35 (0.58 - 3.04)       | >0.05   |
| TT                     | 9.18                                  | 0.84 (0.47 - 1.52)       | >0.05   | 7.97                               | 1.85 (0.46 - 7.52)       | >0.05   |
| AT                     | 2.50                                  | 2.80 (0.79 - 9.95)       | >0.05   | 4.60                               | 0.43 (0.08 - 2.40)       | >0.05   |

<sup>a</sup> rs1870377/ rs2305948. Data are presented as MAF: minor allele frequency; %: percentage; OR<sub>ad</sub>: adjusted odds ratio; CI: confidence interval. Age, gender and pack-year were included in a multivariate logistic regression analyses as potential independent predictors in an additive model.
