# Supplementary material for: Role of HIF1A, VEGFA and VEGFR2 SNPs in the Susceptibility and Progression of COPD in a Spanish Population
Source: PubMed Central journal article supplement (PMC4862690; doi:10.1371/journal.pone.0154998), 2016-05-10
Supplement: pone.0154998.s003.pdf [file pone.0154998.s003.pdf]

**S3Table.** Association study of *VEGFA* haplotypes and COPD.

| Haplotype <sup>a</sup> | COPD patients vs. Nonsmoking controls |                          |         | COPD patients vs. Smoking controls |                          |         |
|------------------------|---------------------------------------|--------------------------|---------|------------------------------------|--------------------------|---------|
|                        | Frequency (%)                         | OR <sub>aj</sub> (95%CI) | p-value | Frequency (%)                      | OR <sub>aj</sub> (95%CI) | p-value |
| CCCGTACTACA            | 13.84                                 | 1                        | —       | 16.42                              | 1                        | —       |
| CCCGTATCACG            | 10.75                                 | 0.68 (0.34 - 1.36)       | >0.05   | 7.64                               | 1.29 (0.19 - 8.96)       | >0.05   |
| TTTATACTACA            | 7.07                                  | 0.89 (0.42 - 1.86)       | >0.05   | 4.57                               | 1.18 (0.15 - 9.31)       | >0.05   |
| TTTACATCACG            | 6.97                                  | 0.49 (0.21 - 1.15)       | >0.05   | 5.12                               | 0.54 (0.10 - 2.85)       | >0.05   |
| CCCGTACCACG            | 5.17                                  | 1.66 (0.70 - 3.94)       | >0.05   | 7.13                               | 0.22 (0.04 - 1.16)       | >0.05   |
| CCCGTACCGTC            | 4.40                                  | 0.73 (0.26 - 2.04)       | >0.05   | 3.22                               | 0.13 (0.01 - 1.31)       | >0.05   |
| TTTACACCGTG            | 4.25                                  | 1.34 (0.51 - 3.53)       | >0.05   | 5.68                               | 1.97 (0.33 - 11.60)      | >0.05   |
| TTTATAACCACA           | 3.68                                  | 1.02 (0.44 - 2.37)       | >0.05   | 4.69                               | 0.36 (0.06 - 2.02)       | >0.05   |
| TCTATAACCACG           | 3.40                                  | 1.80 (0.65 - 4.96)       | >0.05   | 6.30                               | 0.36 (0.06 - 2.20)       | >0.05   |
| TCTATACTACA            | 3.14                                  | 2.03 (0.72 - 5.69)       | >0.05   | 3.68                               | 0.49 (0.09 - 2.61)       | >0.05   |
| TTCACGTCACG            | 3.11                                  | 1.70 (0.53 - 5.51)       | >0.05   | 3.99                               | 5.67 (0.41 - 78.03)      | >0.05   |
| TTCACGCTACA            | 2.86                                  | 1.26 (0.40 - 3.99)       | >0.05   | 4.43                               | 0.43 (0.08 - 2.41)       | >0.05   |
| TTCACGCCACG            | 2.81                                  | 0.44 (0.10 - 1.89)       | >0.05   | 1.20                               | 0.17 (0.01 - 4.97)       | >0.05   |
| TTCACACTACA            | 2.26                                  | 0.39 (0.09 - 1.69)       | >0.05   | 2.04                               | 0.86 (0.09 - 7.91)       | >0.05   |
| TCCGTACCACA            | 2.05                                  | 1.40 (0.41 - 4.70)       | >0.05   | 2.33                               | 0.49 (0.07 - 3.46)       | >0.05   |
| TTTACACCACG            | 1.88                                  | 0.37 (0.09 - 1.58)       | >0.05   | 1.80                               | 0.08 (0.00 - 2.69)       | >0.05   |
| TTCACGCCGTG            | 1.82                                  | 1.65 (0.53 - 5.20)       | >0.05   | 2.67                               | 0.34 (0.04 - 2.77)       | >0.05   |
| TCTATATCACG            | 1.64                                  | 0.20 (0.03 - 1.51)       | >0.05   | 1.81                               | 0.07 (0.00 - 1.38)       | >0.05   |
| TTCACATCACG            | 1.46                                  | 0.26 (0.03 - 2.50)       | >0.05   | 0.00                               | NA (NA - NA)             | —       |
| TCCGTATCACG            | 1.10                                  | 0.42 (0.07 - 2.54)       | >0.05   | 0.00                               | NA (NA - NA)             | —       |
| TTCACATCACA            | 1.00                                  | 0.74 (0.13 - 4.34)       | >0.05   | 0.00                               | NA (NA - NA)             | —       |
| CCCGTACCGCG            | 0.00                                  | NA (NA - NA)             | —       | 1.93                               | 0.40 (0.04 - 4.44)       | >0.05   |
| TTTATATCACG            | 0.00                                  | NA (NA - NA)             | —       | 1.19                               | 0.01 (0.00 - 0.57)       | >0.05   |
| TCCGTACCACG            | 0.00                                  | NA (NA - NA)             | —       | 1.13                               | 0.38 (0.02 - 6.36)       | >0.05   |
| Others                 | 15.32                                 | 0.64 (0.33 - 1.24)       | >0.05   | 11.05                              | 0.46 (0.10 - 2.07)       | >0.05   |

<sup>a</sup> rs833069/ rs833070/ rs3025007/ rs3025009/ rs3025010/ rs3025012/ rs3025020/ rs3025032/ rs3025033/ rs3025039/ rs10434. Data are presented as MAF: minor allele frequency; %: percentage; OR<sub>ad</sub>: adjusted odds ratio; CI: confidence interval. Age, gender and pack-year were included in a multivariate logistic regression analyses as potential independent predictors in an additive model.
