# Supplementary material for: Role of HIF1A, VEGFA and VEGFR2 SNPs in the Susceptibility and Progression of COPD in a Spanish Population
Source: PubMed Central journal article supplement (PMC4862690; doi:10.1371/journal.pone.0154998), 2016-05-10
Supplement: pone.0154998.s005.pdf [file pone.0154998.s005.pdf]

**S5 Table.** Replication study of AATATATCACG haplotype in the *VEGFA* gene with COPD susceptibility.

| Haplotype <sup>a</sup> | COPD patients vs. Nonsmoking controls |                          |         | COPD patients vs. Smoking controls |                          |         |
|------------------------|---------------------------------------|--------------------------|---------|------------------------------------|--------------------------|---------|
|                        | Frequency (%)                         | OR <sub>aj</sub> (95%CI) | p-value | Frequency (%)                      | OR <sub>aj</sub> (95%CI) | p-value |
| GGCGTACTACA            | 12.26                                 | 1                        | —       | 16.27                              | 1                        | —       |
| AATATATCACG            | 2.55                                  | 2.37 (0.40 – 14.03)      | >0.05   | 0.00                               | 0.00 (NA - NA)           | 1       |

Data are presented as MAF: minor allele frequency; %: percentage; OR<sub>ad</sub>: adjusted odds ratio; CI: confidence interval; NA: not analyzed. Age, gender and pack-year were included in a multivariate logistic regression analyses as potential independent predictors in an additive model. <sup>a</sup> rs833069/ rs833070/ rs3025007/ rs3025009/ rs3025010/ rs3025012/ rs3025020/ rs3025032/ rs3025033/ rs3025039/ rs10434.
